# Supplementary material for: Differential Diagnosis of Alzheimer Disease vs. Mild Cognitive Impairment Based on Left Temporal Lateral Lobe Hypomethabolism on 18F-FDG PET/CT and Automated Classifiers
Source: MDPI journal article supplement (doi:10.3390/diagnostics12102425), 2022-10-07
Supplement: s1 [file dataset for analysis.xls]

## Sheet: Foglio1
Age	Gender	Prefrontal Lateral R	Prefrontal Lateral L	Prefrontal Medial R	Prefrontal Medial L	Sensorimotor R	Sensorimotor L	Anterior Cingulate R	Anterior Cingulate L	Posterior Cingulate R	Posterior Cingulate L	Precuneus R	Precuneus L	Parietal Superior R	Parietal Superior L	Parietal Inferior R	Parietal Inferior L	Occipital Lateral R	Occipital Lateral L	Primary Visual R	Primary Visual L	Temporal Lateral R	Temporal Lateral L	Temporal Mesial R	Temporal Mesial L	Cerebellum Whole	Pons	Diagnosis
72	F	-0.8	-1.05	-0.52	-0.66	-0.39	0.15	-0.76	-1.12	-0.68	-1.16	-0.78	-1.11	-1.69	-2.07	-1.27	-1.81	-0.34	-0.6	-0.86	-1.41	-2.21	-3.03	-4.09	-5.49	-0.35	0	AD
70	F	-2.43	-2.93	-2.56	-2.2	-2.72	-2.49	-1.87	-1.72	-1.38	-1.66	-1.77	-2.52	-2.26	-1.9	-2.94	-2.99	-2.16	-2.21	-1.37	-1.04	-3.21	-3.06	-2.92	-2.45	-0.88	0	AD
82	M	-1.26	-1.85	-2.2	-2.61	-1.94	-2.35	-2.19	-2.68	-2.93	-3.91	-4.14	-5.4	-2.36	-2.74	-3.49	-3.6	-1.26	-3.03	-1.19	-1.92	-2.2	-2.9	-3.91	-5.14	-0.7	0	AD
74	F	-3.74	-2.94	-1.82	-0.85	3.95	3.66	-1.32	-1.08	-2.31	-1.68	-0.88	0.17	-0.16	1.8	-3.32	-2.23	1.86	2.2	3.94	4.48	-2.43	-1.64	-0.8	0.93	3.76	0	AD
77	F	-1.35	-1.46	-1.03	-1.52	-1.58	-1.51	-1.6	-2.1	-2.26	-1.65	-3.09	-2.08	-2.2	-2.24	-2.25	-2.28	-1.29	-0.81	-1.58	-0.72	-2.48	-2.02	-2.61	-2.74	-0.18	0	AD
70	F	-1.72	-1.88	-1.66	-1.78	-1.14	-1.04	-1.49	-1.59	-2.25	-2.49	-1.78	-1.83	-1.2	-1.15	-1.47	-1.64	-1.37	-1.41	-0.61	-0.88	-1.47	-1.97	-1.51	-2.16	-1.25	0	FTD
67	F	-0.1	-0.32	0.36	-0.07	-0.54	-0.22	0.29	0.23	-0.44	-0.69	-0.58	-0.75	-0.36	-0.1	-0.46	-0.38	-0.77	-0.17	-1.31	-1.24	-0.49	-0.54	-1.23	-0.72	-1.58	0	AD
62	F	-5.05	-3.63	-2.51	-2.16	-3.17	-2.29	-1.89	-1.57	-4.21	-3.17	-6.14	-3.82	-4.98	-3.39	-6.13	-4.64	-6.17	-4.98	-3.94	-2.65	-6.15	-4.39	-3.37	-2.51	-1.92	0	AD
82	F	-2.37	-2.42	-0.88	-0.98	0.18	0.95	-2.43	-2.26	-4.8	-4.29	-5.32	-3.53	-2.65	-1.63	-4.53	-3.78	-2.64	-2.63	-0.29	0.07	-4.11	-3.92	-3.94	-4.05	-0.37	0	AD
74	F	-1.4	-1.4	-1.59	-1.35	-1.06	-0.88	-0.5	-0.49	-1.73	-1.99	-1.58	-1.41	-0.7	-0.2	-1.31	-1.27	-1.57	-0.25	-1.54	0.09	-1.79	-1.71	-1.47	-1.58	1.14	0	AD
73	F	-1.54	-1.45	-1.16	-1.24	-1.72	-2.27	-1.06	-1.12	-1.3	-1.16	-2.05	-2.35	-3	-1.78	-2.43	-1.8	-1.68	-1.75	-1.21	-1.35	-1.72	-1.36	-1.88	-1.69	-1.45	0	AD
70	M	-4.37	-3.52	-4.21	-2.65	-4.61	-3.06	-2.26	-1.74	-3.72	-3.42	-4.15	-3.38	-4.85	-3.43	-6.05	-4.43	-3.51	-2.56	-2.54	-1.72	-5.74	-3.92	-2.2	-1.14	-0.89	0	AD
59	F	-3.82	-6.02	-2.11	-3.57	0.21	0.13	-2.15	-2.33	-1.88	-2.45	-0.67	-1.75	-0.29	-0.37	-2.66	-4.02	-0.44	-1.26	0.11	0.14	-2.33	-4.02	0.78	-1.45	0.38	0	AD
59	F	-2.35	-2.02	-0.96	-0.88	-0.94	-0.5	-1.92	-1.58	-3.16	-2.49	-2.94	-2.18	-2.07	-0.9	-3.72	-2.69	-2.26	-1.37	-0.74	-0.68	-4.22	-2.39	-3.65	-2.66	-0.74	0	AD
80	F	-3.68	-2.12	-1.51	-1.36	-1.43	-1.6	-0.54	0.04	-1.45	-1.65	-3.51	-4.06	-3.27	-4.19	-2.66	-3.58	-3.59	-5.37	-2.63	-3.18	-3.02	-3.78	-3.51	-3.94	0.52	0	MCI
60	M	-1.96	-1.88	-1.78	-1.58	-1.55	-1.61	-1.46	-1.01	-1.27	-1.09	-1.58	-1.55	-1.14	-1.29	-1.91	-2.04	-1.27	-1.52	-1.06	-0.88	-2.13	-2.36	-0.85	-1.18	-1.34	0	AD
73	F	-2.81	-2.7	-1.83	-1.69	-1.09	-0.54	-1.31	-1.4	-3.08	-2.9	-2.57	-2.33	-2.21	-1.19	-2.75	-2.66	-2.26	-1.65	-2.2	-1.39	-3.09	-2.63	-2.78	-2.94	-0.7	0	MCI
72	F	-0.45	-1.57	0.62	0.48	1.45	0.44	0.75	0.55	-1.29	-1.11	-3.21	-3.92	-2.48	-2.44	-2.56	-3.48	-3.69	-4.33	-2.29	-1.94	-2.04	-3.55	0.49	-0.52	1.42	0	MCI
54	M	-1.31	-1.39	-2.05	-1.65	-1.42	-1.54	-1.09	-0.95	-1.71	-1.54	-1.93	-2.08	-1.83	-2.1	-1.99	-2.69	-0.9	-1.68	-0.39	-1.08	-1.58	-1.62	-0.85	-1.75	-1.08	0	MCI
69	F	-0.61	-0.26	0.04	0.1	0.55	0.5	-0.57	-0.28	-0.1	0.34	-0.05	0.45	-0.65	0.69	-2.78	-0.47	-0.36	0.73	-1.26	0.27	-3.24	-0.7	-0.8	0.05	-0.49	0	APP
67	M	-1.12	-1.71	0.41	-0.05	1.25	1.16	0.9	0.77	-0.8	-0.98	-0.95	-1.19	-1.22	-0.81	-1.84	-2.34	-0.89	-1.17	0.37	0.52	-1.03	-1.73	2.6	0.96	0.47	0	MCI
67	M	-1.36	-1.41	-2.05	-2.26	-1.2	-1.25	-2.05	-2.05	-1.66	-1.26	-1.37	-0.95	-0.85	-0.74	-1.08	-0.98	-0.45	-0.43	-0.14	0.09	-0.79	-0.76	-0.44	-0.6	-1.58	0	MCI
60	M	-1.46	-1.18	-1.39	-0.97	-0.85	-0.7	-1.27	-0.89	-0.14	-0.28	0.05	0.42	0.16	0.41	-0.61	-0.17	0.21	-0.15	-0.39	-0.55	-0.85	-0.42	0.45	0.69	0.2	0	MCI
79	M	-2.24	-3.1	-1.28	-2.27	-0.99	-2.17	-1.65	-1.53	-2.11	-2.42	-2.81	-3.5	-2.16	-3.25	-2.71	-3.91	-1.24	-1.9	-0.7	-0.86	-2.76	-3.61	-2.03	-3.12	-0.04	0	APP
67	M	-0.36	-0.47	0.11	0.05	0.8	0.8	-0.82	-0.78	-1.15	-2.14	-0.02	-0.18	0.09	0.78	-0.9	-0.53	-0.24	-0.1	-0.77	-0.58	-1	-0.97	-1.29	-1.9	-0.15	0	MP con DC
82	F	-5.05	-1.59	-1.19	-1.16	-1.29	-0.57	-1.6	-1.37	-2.47	-2.45	-2.73	-1.87	-2.56	-1.86	-2.87	-2.37	-0.74	-1.32	0.44	-0.45	-2.11	-2.62	-2.89	-2.75	-0.11	0	MCI
75	M	-0.74	-0.01	0.22	0.12	0.29	0.85	-0.22	-0.19	0.16	0.45	0.29	0.27	-0.91	-0.21	0.05	0.49	0.01	0.21	-0.19	0.17	0.37	0.38	0.85	1.34	-0.55	0	MCI
70	F	-2.88	-3.45	-1.94	-2.53	-0.11	-0.48	-1.49	-1.99	-2.73	-3.1	-2.15	-3.17	-1.26	-1.32	-2.71	-3.4	-1.29	-2.03	-1.18	-1.01	-3.71	-4.92	-3.1	-4.59	-1.49	0	AD
61	M	-2.58	-3.97	-1.6	-1.93	-1.09	-1.71	-2	-2.06	-3.42	-3.7	-2.79	-3.4	-1.98	-2.5	-3.7	-4.73	-1.54	-2.3	-1.65	-1.4	-2.94	-4.13	-1.52	-2.26	-1.38	0	AD
48	M	-0.98	-1.2	-0.45	-0.6	0.27	-0.08	-0.2	-0.24	-2.48	-2.14	-1.75	-1.9	-1.12	-0.19	-1.73	-1.27	-1.06	-1.03	-0.14	-0.63	-1.8	-1.83	-3.85	-4.02	-4.21	0	MCI
83	F	-1.9	-1.73	-1.71	-1.66	-1.69	-1.34	-0.89	-1.23	-2.57	-2.62	-2.89	-2.47	-3	-3.5	-2.08	-2.11	-1.02	-1.34	0.52	0.53	-1.58	-1.79	-2.01	-2.82	0.09	0	MCI
63	F	-1.71	-2.09	-0.61	-0.75	-0.79	-0.8	-0.48	-0.73	-2.52	-2.57	-1.9	-2.21	-1.64	-1.92	-3.22	-3.7	0.1	-1.73	1.02	0.77	-2.7	-3.65	-2.2	-2.9	0.03	0	AD
80	M	0.96	0.64	-1.98	-1.53	0.5	0.27	-2.4	-1.39	-0.83	-1.09	-1.34	-1.01	-1.25	-0.83	-0.18	-0.53	0.63	-0.23	0.3	0.26	-0.66	-1.61	-1.93	-3.09	-0.43	0	AD
79	M	-0.85	-0.66	-1.04	-0.22	-0.83	-0.52	-0.67	-0.42	-1.83	-1.26	-2.59	-1.63	-2.62	-1.12	-1.8	-0.95	-1.52	-1.41	-1.36	-1.95	-1.48	-0.24	-1.22	0.09	-0.1	0	MCI
75	M	-1.93	-2.2	-2.55	-3.78	-3.9	-3.17	-1.19	-2.22	-2.4	-2.36	-2.6	-2.26	-4.77	-3.85	-2.65	-3.73	-1.62	-2.34	-1.25	-1.64	-1.94	-2.15	-1.18	-1.54	-0.25	0	AD
64	F	-1.69	-1.54	-1.71	-1.58	-1.03	-1.17	-1.36	-1.44	-2.26	-1.83	-1.63	-1.25	-2.1	-1.05	-1.81	-1.2	-1.53	-0.61	-1.03	-0.22	-1.73	-1.06	-2.88	-1.84	-1.75	0	MCI
84	F	-0.51	-3.41	0.33	-1.54	2.33	1.03	-0.41	-1.67	-0.99	-2.68	0.36	-3.12	-0.7	-2.05	-0.46	-3.83	1.2	-1.67	1.78	-0.08	-0.01	-3.54	1.79	-2.17	0.56	0	APP
55	F	0.06	-0.05	0.49	0.5	0.63	0.54	0.26	0.26	0.34	0.59	-0.02	-0.14	0.22	0.62	-0.39	0.39	0.34	-0.07	-0.04	-2.48	0.23	0.43	0.86	0.71	-0.65	0	MCI
46	F	-0.25	-0.41	0.39	0.2	-0.03	-0.02	-0.4	-0.35	0.09	0.1	-0.55	-0.68	0.52	0.14	-0.21	-0.52	-0.42	-0.47	-0.22	-0.08	-0.96	-1.06	-1.18	-1.33	-0.01	0	MCI
72	F	-1.57	-1.55	-1.78	-2.04	-1.42	-1.25	-1.8	-1.5	-2.63	-2.23	-1.61	-1.36	-1.54	-1.29	-1.82	-1.26	-0.79	-0.72	-0.41	-0.14	-1.48	-1.23	-2.28	-1.38	0.37	0	MCI
69	F	-0.34	-0.21	-0.14	-0.15	0.07	-0.08	-1.24	-1.39	-0.41	-0.71	0.04	-0.15	-0.55	-0.37	-0.19	-0.23	0.36	0.34	0.08	-0.26	0.26	0.06	-0.42	-0.97	0.12	0	FTD
69	F	-2.14	-2.78	-1.98	-2.42	-1.51	-1.84	-1.28	-1.54	-1.64	-2.43	-1.53	-2.36	-1.54	-1.79	-1.97	-3	-1.31	-1.88	-1.33	-1.71	-1.82	-2.88	-1.55	-2.85	-0.72	0	APP
80	F	-1.5	-1.66	-1.09	-1.01	-0.42	-0.12	-1.7	-1.74	-3.29	-2.86	-2.72	-2.27	-1.99	-1.05	-1.83	-2.2	-0.84	-1.26	-1.58	-1.09	-1.79	-1.88	-1.8	-2.45	-0.17	0	MCI
84	F	-1.17	-0.51	-1.33	-0.44	2.51	2.46	-1.16	-1.14	-0.64	0.4	-0.61	0.49	0.29	1.66	-1.06	-0.48	0.72	0.27	1.39	1.49	-0.8	-0.36	-3.48	-2.23	1.55	0	MCI
75	M	-1.26	-0.51	-1.33	-0.39	0.77	1.14	-1.2	0.09	-2.01	-0.92	-4.41	-2.09	-0.72	-0.09	-2.25	-1.75	-2.03	-1.19	-1.54	-0.95	-2.73	-1.46	-2.56	-0.05	-0.39	0	MCI
79	F	-0.41	-0.71	-0.28	-0.76	-0.13	-0.42	-0.4	-0.28	-1.61	-1.68	-1.67	-2.4	-0.75	-2.15	-1.05	-1.53	-0.13	-1.25	-0.83	-0.48	-0.76	-1.34	-1.07	-2.53	0.84	0	MCI
84	F	-4.17	-2.96	-3.24	-2.15	-1.75	-0.92	-2.03	-1.68	-2.57	-1.79	-2.58	-1.46	-1.52	-0.87	-3.23	-2.07	0.31	0.23	0.19	-0.01	-2.43	-1.59	-2.6	-2.46	-0.64	0	MCI
63	M	-1.32	-1.54	-0.9	-0.8	-1.03	-1.29	-0.52	-0.6	-0.93	-0.74	-1.13	-1.17	-1.35	-1.63	-1.58	-2.13	-1.93	-2.81	-1.62	-2.07	-1.5	-1.81	-0.18	-0.62	-1.13	0	MCI
69	F	-0.91	-0.53	-0.65	-0.41	1.06	1.15	-0.34	-0.42	-1.51	-1.08	-0.08	0.06	-1.19	0.5	-1.76	-0.81	0.08	0.49	-0.64	0.9	-1.91	-1.55	-3.54	-3.61	2.42	0	AD
75	F	-0.16	-0.36	-0.47	-0.54	0.93	1.19	-0.59	-0.86	0.31	0.79	1.07	0.48	0.21	-0.5	0.31	0.95	1.51	1.69	-0.48	1.83	0.25	0.8	-2.96	-2.5	-0.75	0	MCI
74	F	-1.44	-2.45	-1.06	-1.26	-0.76	-1.14	-1.16	-1.47	-2.44	-2.52	-1.34	-2.02	-0.12	-1.74	-1.39	-2.33	-0.61	-0.9	-0.92	-0.91	-1.62	-2.46	-1.7	-2.81	-0.63	0	aMCI?
85	M	-0.63	-1.63	-0.27	-2.49	2.16	1.67	-0.12	-1.8	0.71	-0.24	0	-0.75	-0.04	0.42	-0.76	-0.76	0.61	0.3	0.56	0.39	-0.57	-0.79	-0.68	-2.3	-0.61	0	aMCI?
68	F	1.63	1.66	1.43	1.23	1	1.05	2.37	1.93	2.22	2.1	0.94	1.07	0.49	0.72	0.71	0.86	1.5	1.76	0.9	1.13	0.98	1.11	0.54	1.35	-0.86	0	aMCI?
71	F	-2.82	-3.17	-2.4	-3.4	0.11	-0.36	-2.55	-2.97	-0.52	0.03	0.13	0.44	-0.01	-0.48	-0.9	-1.92	-0.18	0.42	0.06	0.88	-1	-1.64	1.08	1.02	2.47	0	AD
72	F	-2.55	-4.21	-0.69	-1.54	0.86	0.17	-0.36	-1.21	-1.76	-2.22	-1.21	-2.09	-1.01	-1.14	-1.49	-2.67	0.71	-0.32	0.92	0.96	-0.88	-2.78	-0.27	-0.24	-0.6	0	APP
64	F	-3.39	-2.07	-2.22	-1.48	-1.2	-0.99	-1.8	-1.55	-2.96	-2.14	-2.37	-1.24	-1.64	-0.7	-2.96	-1.49	-1.6	-1.44	-1.24	-1.83	-2.92	-1.83	-2.62	-1.68	-1.33	0	FTD
60	M	-2.21	-2.38	-2.21	-1.57	-1.55	-1.53	-1.43	-1.14	-0.86	-0.56	-1.36	-1.19	-1.06	-1.04	-2.2	-2.15	-1.38	-1.3	-1.27	-1.38	-2.06	-1.76	-1.49	-1.82	0.15	0	MCI
40	M	-4.42	-4.54	-4.54	-4.3	-4.09	-4.5	-4.27	-4.41	-4.24	-4.25	-5.05	-4.9	-5.5	-4.68	-5.25	-6.09	-2.64	-3.05	-2.01	-1.67	-3.59	-3.78	-2.25	-2.85	-1.82	0	MCI
65	F	-1.8	-2.63	-2.06	-2.95	-1.44	-1.9	-1.24	-1.86	-1.27	-1.47	-0.91	-1.45	-0.89	-1.39	-1.12	-1.98	-0.88	-1.31	-1.21	-1.6	-2.25	-3.59	-2.31	-4.73	-0.73	0	AD
74	F	0.41	1.03	1.23	1.47	2.14	2.34	0.94	1.1	2.01	2.03	0.03	0.44	-0.14	0.76	-0.27	0.61	0.02	0.2	0.17	-0.29	0.99	1.66	2.34	2.15	0.97	0	MCI
69	F	-3.07	-1.43	-2.62	-1.17	-0.71	0.62	-3.15	-1.78	-2.63	-2.06	-3.84	-1.8	-2.78	-1.28	-3.84	-1.83	-3.19	-1.89	-1.05	-0.35	-5.24	-2.31	-2.71	-1.72	0.25	0	APP
52	F	-0.18	-0.04	0.53	0.48	0.1	0.5	-0.26	0.14	1.09	1.11	0.98	0.78	0.63	0.45	-0.39	0.04	0.18	0.43	0.44	0.53	-0.54	-0.32	0.28	0.06	0.3	0	MCI
55	M	-1.66	-2.04	-2.01	-2.17	-0.73	-0.89	-2.07	-1.92	-0.19	-0.53	-0.3	-0.49	-1.12	-0.91	-2.05	-2.78	-0.94	-0.86	0.51	0.7	-3.01	-3.26	-2.21	-4.2	0.2	0	AD
76	M	-1.54	-1.18	-0.89	-0.42	-2.38	-1.76	-0.33	-0.35	0.16	-0.04	-0.78	-1.17	-1.45	-4.76	-1.08	-0.44	-0.22	-0.2	0.53	0.34	-0.76	-0.46	0.12	-0.44	0.3	0	MCI
70	M	-2.38	-2.38	-2.4	-2.24	-1.84	-2	-1.1	-0.63	-3.38	-2.99	-3.19	-3.06	-2.67	-2.74	-4.12	-3.21	-3.17	-2.82	-1.38	-0.96	-5.78	-4.92	-4.71	-4.39	-1.62	0	MCI
74	F	-2.08	-1.41	-2.12	-1.05	-1.93	-1.56	-0.88	-0.03	-1.27	-0.75	-1.66	-1.08	-3.11	-2.49	-2.45	-1.52	-1.52	-0.98	-1.2	-0.51	-2.26	-1.42	-2.34	-1.24	-0.16	0	MCI
71	M	-0.89	-0.66	-0.9	-0.45	-0.27	-0.55	-0.66	-0.11	-1.7	-1.55	-1.08	-0.89	-1.24	-1.53	-1.01	-1.62	-0.41	-0.86	-0.41	-0.86	-1.07	-1.93	-1	-1.38	1.69	0	AD
70	F	-1.48	-0.9	-0.54	-0.3	-1.21	-0.86	-0.93	-0.63	-2.19	-1.22	-1.59	-1.35	-1.71	-0.9	-2.46	-1.92	-0.8	-0.84	-0.25	-0.26	-3.5	-1.98	-3.34	-1.58	-0.88	0	MCI
53	M	-6.98	-5.14	-3.6	-2.14	-3.19	-2.42	-2.48	-1.24	-5.6	-4.23	-5.03	-4.79	-5.63	-4.3	-7.81	-6.83	-4.14	-3.67	-2.07	-1.14	-6.58	-4.43	-2.07	-0.79	-0.21	0	FTD
66	M	-3	-2.39	-1.36	-0.79	-0.68	-0.59	-2.59	-2.88	-4.06	-3.88	-1.4	-0.58	-1.21	-0.64	-3.29	-1.97	0	0.34	1.28	1.58	-3.82	-2.8	-4.54	-4.3	-0.55	0	MCI
76	F	-1.91	-1.92	-1.19	-1.22	-2.11	-2.02	-0.8	-1.08	-2.25	-1.86	-3.37	-2.63	-3.75	-3.97	-2.36	-2.32	-2.41	-2.12	-1.73	-1.81	-2.14	-2.55	-3.79	-4.09	-0.86	0	AD
69	M	-0.8	-0.8	-0.83	-0.93	-0.34	-0.28	-1.16	-1.04	-1.68	-1.54	-0.83	-0.67	-0.11	-0.22	-0.79	-0.49	-0.81	-0.39	-0.64	-0.38	-1.47	-0.84	-3.34	-2.05	-0.25	0	MCI
59	M	-2.79	-3.2	-3.13	-4.14	-1.52	-1.39	-2.78	-2.82	-1.11	-1.16	-1.36	-1.43	-1.6	-1.31	-2.29	-2.21	-1.63	-1.69	-1.71	-1.26	-2.73	-2.48	-1.78	-1.37	0.36	0	FTD
52	M	-0.39	-0.67	-0.6	-0.37	-0.04	-0.31	-1.19	-1.06	-0.09	0.21	-0.26	-0.45	0.08	-0.65	-0.71	-0.54	0.03	0.09	-0.44	-0.36	-0.38	-0.62	0.09	-0.61	-0.36	0	MCI
82	M	3.52	3.33	0.75	0.54	2.91	2.91	2.27	2.27	3.39	3.4	3.72	3.93	1.53	3.14	3.45	3.2	4.74	4.96	4.41	4.89	2.67	2.04	1.06	-1.06	2.96	0	MCI
82	M	-2.58	-3.2	-2.39	-2.46	-1.58	-2.38	-1.9	-1.84	-2.89	-3.11	-3.75	-3.93	-2.99	-3.8	-3.08	-3.54	-2.2	-2.73	-2.09	-1.93	-2.55	-3.32	-1.96	-3.25	-2.37	0	FTD
79	M	-1.28	-1.9	-1.08	-1.88	-1.56	-1.35	-1.02	-1.36	-2.13	-2.72	-2.73	-3.27	-2.58	-2.87	-2.95	-2.55	-1.19	-2.01	1.17	0.64	-1.94	-2.36	-2.27	-3.36	-1.22	0	AD
76	F	-1.46	-1.56	-1.35	-1.14	-1.2	-1.44	-0.64	-0.39	-2.39	-2.29	-2.51	-2.32	-3.08	-3.75	-2.16	-1.97	-1.37	-1.5	-0.55	-0.52	-2.62	-1.78	-1.96	-2.43	-0.49	0	AD
78	M	-1.54	-1.73	-1.03	-1.42	-0.1	-0.16	-0.7	-0.79	-2.06	-2.4	-1.92	-1.53	-1.12	-0.61	-0.81	-1.02	0.35	0.12	0.9	0.29	-0.05	-0.46	-0.11	-0.35	0.03	0	MCI
84	M	-1.31	-1.43	-2.5	-1.95	-0.78	-1.23	-1.65	-1.44	-1.79	-1.18	-1.9	-1.57	-1.37	-1.43	-0.93	-1.03	0.23	0.25	-0.38	0.45	-1.01	-0.74	-2.21	-2.62	-0.96	0	MCI
75	F	-1.95	-2.05	-1.58	-1.47	-2.45	-2.07	-1.42	-1.1	-2.19	-2.88	-2.4	-2.89	-1.65	-2.79	-1.6	-2.12	-0.34	-0.8	-0.73	-1.1	-1.49	-2.01	-2.93	-3.27	0.85	0	MCI
55	F	-2.33	-2.7	-0.56	-0.7	-1.02	-0.79	-1.44	-1.5	-0.81	-0.36	-1.39	-1.81	-1.94	-1.19	-2.84	-3.14	-1.54	-1.52	-2.04	-2.06	-2.74	-2.93	-1.06	-2.25	-0.14	0	MCI
72	F	1.23	1.24	1.68	1.87	1.92	1.82	0.73	0.34	-0.19	0.1	0.37	0.81	-0.6	0.38	-0.55	0.29	-0.08	0.29	0.39	0.9	-0.05	0.23	-1.45	-1.02	1.05	0	MCI
64	M	-1.67	-1.72	-1.39	-1.35	-0.73	-0.5	-1.02	-1.02	-1.4	-1.25	-1.36	-1.26	-1.15	-0.84	-1.38	-1.31	-0.84	-1.03	-0.05	-0.04	-1.21	-1.26	-0.73	-1.12	-1.85	0	MCI
85	F	-2.33	-2.11	-1.88	-2.08	-1.72	-1.07	-0.78	-1.34	-2.1	-1.78	-2.33	-1.9	-3.49	-2	-2.52	-1.93	-0.73	-0.89	-0.51	-0.67	-2.61	-1.92	-2.66	-2.02	0.75	0	MCI
73	M	-1.72	-2.03	-0.95	-1.77	0.8	1.16	-1.11	-1.27	-2.71	-2.2	-0.92	-1.28	-0.95	-0.42	-2.25	-2.52	-0.94	-1.27	-0.55	-0.52	-1.93	-2.78	0.07	-0.43	-0.18	0	AD
42	M	-1.43	-1.24	-1.17	-1.17	-1.18	-0.69	-1.06	-0.67	-0.9	-0.75	-0.36	-0.42	-0.79	-0.71	-1.34	-1.47	-1.18	-0.75	-0.04	-0.41	-1.85	-1.8	-0.92	-1.08	0.21	0	FTD
79	M	-1.48	-1.7	-1.48	-1.83	0.52	0.53	-0.84	-0.98	-1.69	-1.93	-1.45	-1.31	-0.77	-0.04	-1.16	-1.56	-0.85	-1.08	-0.27	-0.15	-1.49	-1.85	-3.01	-3.11	-1.62	0	MCI
74	F	-0.65	-1.02	-0.13	-0.62	0.88	1.32	-0.19	-0.4	-1.94	-2.26	-0.83	-0.92	-0.4	-0.38	-1.04	-0.79	-0.01	-0.29	1.39	0.34	-0.43	-0.01	-1.8	-2.21	1.02	0	AD
76	F	-2.2	-2.32	-1.97	-1.91	-1.96	-1.73	-0.91	-0.98	-3.03	-2.91	-3.91	-3.25	-3.24	-2.86	-3.05	-3.25	-0.69	-1.01	0.35	-0.65	-2.7	-2.25	-1.39	-1.64	-0.05	0	AD
70	F	0.44	-0.28	-0.83	-0.58	-0.21	-0.82	0.1	-0.05	-1.29	-2.22	-0.44	-1.59	-0.16	-0.64	0.6	-0.71	0.3	-0.95	-0.21	-0.92	0.58	-0.7	-0.3	-1.15	1.91	0	MCI
69	F	-1.4	-2.23	-0.01	-0.3	0.32	-0.87	-0.93	-0.99	-3.29	-3.58	-2.78	-2.93	-1.6	-1.32	-2.05	-2.57	-1.98	-2.8	0.88	-0.12	-2.38	-2.82	-2.46	-3.05	1.17	0	AD
78	M	-3.3	-1.51	-0.98	-1.51	-2.39	-1.03	-1.01	-1.15	-1.02	-2.04	-1.65	-2.64	-2.12	-1.37	-1.99	-1.54	-0.36	-0.97	-0.3	-1.5	-1.01	-1.4	1.06	-0.77	-0.33	0	MCI
83	M	-1.82	-1.31	-1.16	-1.39	-0.46	-0.34	-0.94	-1.53	-1.23	-1.24	-2.49	-1.77	-1.65	-2.05	-2.7	-1.99	-2.58	-1.64	-1.55	-0.7	-2.94	-1.6	-3.7	-2.48	-1.13	0	MCI
69	F	-1.88	-2.26	-0.97	-1.12	0.06	-0.03	-0.36	-0.34	-0.58	-1.44	-1.28	-2.09	-2.15	-1.41	-2.4	-3.49	-2.06	-3.6	-0.93	-1.74	-3.01	-4.07	-0.89	-2.96	-2.37	0	AD
73	F	-4.9	-1.2	-4.15	-0.4	2.11	2.54	-2.24	-0.99	-1.69	-1.13	-0.75	1.22	-0.99	0.16	-2.33	0	1.16	1.16	2.13	0.43	-1.75	0.26	-1.31	-0.47	-0.65	0	AD
59	M	-3.26	-2.6	-2.64	-2.1	-1.62	-1.43	-2.29	-1.54	-3.15	-1.92	-3.22	-2.18	-2.2	-2.08	-4.84	-3.62	-2.89	-2.3	-2.26	-1.11	-5.99	-4.36	-3.58	-2.32	-1.99	0	APP
72	M	-3.31	-4.43	-3.18	-3.98	-1.32	-2.32	-1.95	-2.14	-5.31	-5.73	-4.96	-5.82	-4.18	-4.66	-5.8	-6.46	-2.05	-3.16	-1	-1.83	-5.82	-6.38	-2.3	-2.95	-1.02	0	APP
71	M	-0.85	-1.56	-0.42	-1.2	-0.56	-1.38	0.12	-0.36	-1.08	-1.4	-0.95	-1.82	-1.02	-0.89	-0.97	-1.66	0.08	-0.57	-0.06	-0.19	-0.61	-0.71	0.63	0.3	-0.68	0	MCI
83	F	-2.62	-1.35	-3.12	-1.73	-0.09	-0.21	-2.05	-1.85	-3.81	-2.1	-6.99	-1.9	-3.18	-1.86	-4.48	-2.11	-5.89	-3.41	-2.15	-0.08	-5.71	-2.86	-6.32	-4.69	0.35	0	AD
70	F	-1.54	-1.1	-0.33	0.04	-0.01	0.36	0.31	0.26	-1.96	-1.44	-1.09	-1.3	-0.6	-0.34	-2.11	-1.88	-0.03	-0.36	0.44	0.64	-2.05	-2.49	-0.92	-1.19	0.11	0	AD
68	M	-1.6	-1.52	-1.76	-1.3	-1.19	-1.26	-0.69	-0.66	-1.3	-1.07	-2.07	-1.35	-1.54	-1.56	-1.69	-1.81	-1.76	-2.3	-0.81	-1.35	-2.03	-2.31	-1.62	-1.41	-2.17	0	FTD
71	F	-1	-1.13	-0.75	-0.9	-0.61	-1.17	-0.57	0.02	-1.67	-1.76	-2.18	-1.83	-1.75	-2.25	-1.45	-1.85	-0.79	-1.22	-0.17	-0.19	-1.44	-1.72	-0.77	-1.2	-0.29	0	MCI
73	F	-1.79	-1.22	-0.61	-0.46	0.76	0.62	-3.82	-3.45	-3.39	-2.56	-2.39	-1.89	-1.46	-0.65	-2.72	-2.06	-0.06	-0.09	1.62	1.7	-2.4	-1.2	-4.87	-2.43	-0.27	0	MCI
78	F	-2.5	-2.29	-1.57	-1.71	-1.78	-1.69	-1.09	-1.2	-1.27	-2.39	-2	-1.91	-1.72	-1.13	-2.82	-2.49	-1.14	-1.4	-0.57	-0.46	-2.64	-2.49	-1.09	-1.28	-1.26	0	AD
73	M	-1.76	-3.39	-0.99	-2.68	-1.64	-2.03	-1.33	-3.31	-3.78	-5.79	-2.05	-4.06	-2.12	-2.59	-4.03	-5.27	-1.42	-3.17	-1.54	-2.24	-4.08	-6.73	-4.99	-6.48	-2.31	0	APP
82	M	-2.73	-2.06	-4.36	-2.17	-2.28	-1.32	-2.51	-1.45	-3.48	-1.82	-4.33	-2.36	-2.33	-2.38	-3.26	-2.03	-0.17	-0.79	0.23	-0.72	-4.12	-2.6	-5.05	-3.39	-2.42	0	AD
69	F	-1.43	-1.66	-1.04	-1.18	-1.04	-1.19	-1	-1.12	-1.53	-1.5	-1.55	-1.29	-1.2	-1.48	-1.69	-1.79	-0.27	-0.5	-0.33	-0.58	-2.08	-1.75	-2.71	-1.96	-0.88	0	MCI
58	F	0.88	1.08	1.57	1.4	0.58	0.58	1.38	1.57	1.7	1.43	1.55	1.68	1.29	1.41	1	1.26	0.63	1	0.73	0.65	0.18	0.08	0.52	0.72	1.07	0	MCI
73	M	-0.77	-0.43	-0.68	-0.78	0.79	1	-0.07	0.05	-0.34	0.02	-1.12	-0.52	0.06	1.08	-2.04	-0.86	-0.71	0.21	-1.39	-0.5	-2.79	-1.35	-1.68	-0.1	-2.09	0	MCI
76	F	-1.59	-2.33	-1.59	-1.41	-0.62	-1.37	-1.7	-2.32	-2.29	-2.53	-2.13	-2.04	-1.02	-0.04	-2.1	-2.75	0.98	0.09	-0.66	-0.4	-1.15	-2	-2.89	-3.5	-1.01	0	MCI
63	M	-1.4	-4.55	-0.84	-3.47	2.44	0.08	-1.97	-3.05	0.88	-1.29	3.4	0.35	2.69	0.01	1.51	-1.29	3.92	2.97	4.03	3.23	1.38	-0.19	1.69	-0.58	0.71	0	FTD
78	M	-0.47	-1.73	-0.21	-1.44	-0.74	-1.02	-0.3	-1.13	-1.16	-2.21	-1.25	-2.64	-0.86	-1.07	-0.98	-1.7	-0.93	-0.74	-0.61	0.87	-1.24	-1.53	-1.68	-5.01	-1.6	0	MCI
73	M	-3.61	-2.61	-4.63	-3	-1.82	-0.76	-3.16	-2.68	-2.25	-3.06	-1.6	-2.04	-1.71	-0.6	-3.31	-1.74	-0.83	-0.59	-0.98	-0.94	-3.26	-2.09	-2.87	-2.49	0.79	0	AD
66	M	-1.03	-2.37	-0.61	-1.81	-0.38	-0.43	-1.8	-2.01	-0.79	-1.11	0.35	-0.71	-0.19	0.21	-0.25	-1.37	0.13	-0.24	0.28	-0.04	-0.01	-0.91	0.77	0.21	-1.18	0	FTD
75	M	5.26	4.96	4.93	4.95	6.26	6.05	3.67	4.22	1.82	2.36	4.02	3.24	4.53	4.88	5.21	4.29	5.64	5.54	4.61	4.67	5.46	5.31	6.26	7.95	3.87	0	MCI
73	F	-0.62	-0.49	0.18	0.48	-1.13	-0.61	1.15	0.67	0.66	0.07	0.2	-0.45	-1.21	-1.03	-0.5	-0.36	-0.58	-0.73	-1.08	-0.61	-0.15	0.12	0.75	0.22	-0.23	0	MCI
75	F	-2.48	-2.79	-1.43	-2.13	-2.49	-2.97	-0.17	-0.67	-1.54	-1.43	-2.77	-2.99	-3.85	-3.4	-3.17	-3.07	-2.69	-2.56	-3.27	-1.63	-3.09	-3.21	-2.05	-2.39	-0.98	0	APP
55	F	-4.05	-4.86	-3.38	-3.51	-2.71	-2.89	-3.22	-3.05	-3.83	-4.39	-3.01	-4.23	-2.03	-2.65	-3.95	-4.94	-1.83	-2.41	-1.05	-1.61	-3.86	-4.42	-2.94	-4.5	-2.45	0	AD
63	M	-1.56	-1.63	-1.07	-1.3	-0.99	-1.14	-0.67	-0.54	-0.18	-0.29	-0.26	-0.27	-0.7	-0.61	-1.12	-1.06	-0.68	-0.7	0.1	-0.06	-1.68	-1.67	-0.04	-0.8	0.11	0	MCI
77	M	-1.77	-2.52	-2.36	-2.41	-1.58	-1.8	-1.28	-1.26	-1.76	-2.43	-2.81	-2.95	-2.53	-2.78	-1.57	-2.27	-0.76	-1.64	-2.42	-2.71	-1.35	-1.84	-2.07	-3.74	-2.56	0	AD
74	F	-2.06	-2.21	-1.95	-3.03	-1.28	-1.47	-1.1	-1.58	-2.33	-2.53	-0.93	-1.16	-0.45	-0.45	-1.61	-2.75	-0.58	-1	-0.86	-0.9	-1.89	-3.16	-1.83	-3.13	-1.71	0	MCI
74	F	-1.76	-1.4	-0.96	-0.74	0.77	-0.05	-0.76	-0.24	-1.58	-1.19	-1.9	-0.69	-0.38	-0.06	-2.64	-1.84	-0.68	-1.21	-1	-1.26	-3.35	-2.85	-2.5	-2.12	-3.07	0	AD
69	M	-2.6	-2.62	-2.22	-1.94	-2.76	-2.37	-1.27	-1.16	-2.52	-2.13	-3.54	-2.71	-3.31	-2.09	-3.91	-3.23	-3.41	-2.88	-1.68	-1.51	-3.82	-3.5	-2.75	-2.46	-0.81	0	AD
71	F	-1.46	-1.11	-0.49	-0.34	0.42	-0.63	0.45	0.65	-1.4	-1.5	-2.36	-2.06	-3.61	-2.58	-3.89	-3.67	-3.52	-3.95	-1.85	-1.38	-4.41	-5.13	-1.87	-2.81	-1.06	0	APP
71	F	0.06	-0.79	-0.14	-0.46	-0.5	-0.12	0.15	-0.1	-0.02	0.03	-0.76	-0.51	-1.3	-1.06	-0.1	-0.48	-1.02	-1.03	-1.27	-1.23	-0.02	-0.35	0.4	0.11	-0.18	0	MCI
83	F	-0.94	-0.84	-0.59	-0.61	-0.87	-1.12	-0.28	-0.34	-1.43	-1.56	-1.5	-1.66	-2.63	-1.69	-1.87	-1.78	0.12	0.06	0.31	1.01	-0.84	-0.8	0.61	1.22	1.45	0	MCI
76	M	-1.69	-0.98	-1.05	-0.36	-1.83	-1.33	-0.54	-0.15	-1.72	-1.9	-2.8	-2.3	-3.88	-3.01	-4.76	-1.99	0.17	0.35	0.28	0.96	-2.46	-0.58	-2.06	-0.64	-2.17	0	MCI
77	F	-0.03	-0.35	-0.11	0.06	0.02	0	0.11	0.34	-0.88	-1.07	-0.85	-1.73	-0.97	-1.8	-0.87	-2.03	-0.83	-1.25	-0.02	-0.11	-0.4	-1.24	-1.86	-3.13	-0.31	0	MCI
76	M	-2.95	-1.84	-1.81	-1.05	0.36	0.37	-1.53	-1.01	-2.24	-1.53	-3.17	-1.58	-2.32	-0.29	-4.26	-2.18	-1.78	-0.72	-0.39	0.69	-4.55	-2.14	-4.18	-3.7	-0.75	0	AD
69	F	-2.48	-2.86	-2.11	-2.89	-1.51	-2.31	-1.89	-2.31	-1.98	-2.05	-1.72	-1.93	-2.28	-2.04	-1.94	-2.68	-1.54	-1.62	-0.99	-1.08	-1.95	-2.51	-1.36	-2.99	-2.57	0	MCI
78	M	-3.54	-3.83	-2.65	-3.43	-3.28	-2.75	-1.48	-2.16	-2.79	-3.56	-5.29	-5.39	-3.73	-3.53	-4.28	-4.39	-3.07	-4.65	-1.82	-2.44	-3.91	-4.19	-1.66	-3.81	-1.09	0	AD
77	F	-2.55	-1.34	-1.43	-0.94	-0.48	0.05	0.16	0.23	-2.48	-1.23	-3.96	-2.33	-5.21	-2.93	-4.41	-2.67	-3.65	-2.34	-2.24	-1.61	-4.31	-2.97	-3.35	-2.58	-2.08	0	MCI
70	M	-3.07	-3.17	-2.99	-3.04	-1.55	-1.71	-1.53	-1.76	-3.42	-3.21	-2.83	-3.28	-1.77	-1.93	-2.68	-2.92	-1.64	-1.55	-1.7	-1.43	-2.09	-2.19	-2.28	-2.87	-0.38	0	MCI
76	F	-2.14	-2.53	-1.53	-2.2	-2.88	-2.72	-0.47	-0.73	-1.52	-1.73	-3.34	-3.59	-3.07	-3.11	-3.15	-3.18	-2.44	-2.79	-2.62	-2.22	-2.57	-2.85	-2.09	-2.56	-2.05	0	MCI
70	F	-4.67	-4.27	-2.44	-2.03	-2.79	-2.45	-0.41	-0.2	-4.22	-3.96	-4.5	-4.56	-4.78	-4.84	-5.46	-5.2	-4.21	-4.12	-1.85	-2.34	-4.05	-3.68	-0.23	0.31	-1.88	0	AD
75	F	-0.17	-0.58	-0.47	-0.25	0.66	-0.42	-0.27	-0.45	-3.23	-3.64	-3.78	-4.65	-2.49	-2.96	-2.94	-3.77	-0.34	-2.9	0.07	-0.72	-2.96	-3.92	-2.68	-3.96	-0.3	0	AD
68	F	-2.19	-1.94	-1.78	-1.92	-2.58	-2.41	-2.06	-1.8	-1.3	-1.72	-2.03	-2.59	-3.26	-2.82	-1.99	-2.33	-1.6	-1.81	-1.2	-1.69	-1.68	-1.53	-1.12	-1.18	-1.3	0	MCI
83	F	-3.08	-3.42	-2.42	-3.38	-2.01	-2.52	-1.57	-1.73	-2.22	-2.13	-3.45	-2.79	-4.66	-3.92	-2.51	-3.37	-2.25	-2.54	-1.65	-2.09	-2.17	-2.85	-2.72	-3.25	-0.74	0	MCI
81	M	-3.04	-2.82	-2.49	-2.2	-2.61	-2.17	-2.76	-2.04	-2.91	-2.94	-3.57	-3.31	-2.76	-2.88	-3.95	-3.6	-2.19	-1.62	-1.37	-0.92	-3.28	-2.88	-3.43	-3.34	-1.26	0	AD
75	F	-2.07	-1.68	-0.99	-0.83	-1.11	-1.08	0.28	0.28	-2.1	-1.37	-3.43	-1.97	-5.45	-3.15	-3.86	-2.85	-4.54	-3	-2.23	-0.81	-2.93	-2.47	-3.43	-2.96	-0.32	0	AD
75	M	-2.63	-3.61	-2.23	-3.94	-2.63	-2.8	-1.41	-2.18	-2.6	-3.74	-3.87	-4.95	-3.37	-3.55	-3.03	-4.66	-2.06	-3.46	-1.66	-1.68	-3.21	-5.8	-2.43	-5.74	-2.66	0	APP
64	F	-1.96	-2.36	-1.79	-1.9	-1.2	-1.42	-1.52	-1.79	-1.95	-2.09	-2.03	-2.15	-2.02	-2.62	-2.65	-3.3	-2.1	-2.75	-1.95	-1.64	-2.26	-2.98	-1.88	-2.65	-1.59	0	AD
66	M	-1.68	-1.53	-1.11	-1.27	-0.81	-0.8	-1.42	-1.05	-2.03	-1.84	-2.1	-1.53	-1.14	-0.75	-1.63	-1.46	0.41	-0.06	-0.82	-1.29	-0.52	-0.52	-2.04	-0.93	-1.88	0	FTD
63	F	-2.37	-2.56	-2.3	-1.66	-1.06	-1.18	-0.17	-0.2	-0.54	-0.37	-1.52	-1.62	-1.59	-1.38	-2.28	-2.21	-1.54	-1.6	-1.29	-1.28	-2.46	-2.47	-0.26	-0.58	0.46	0	AD
49	F	-1.94	-3.5	-0.56	-0.91	-0.11	-1.07	0.11	-0.49	-3.75	-4.38	-4.59	-5.47	-4.82	-4.53	-5.41	-6.96	-2.03	-3.87	0.24	0.38	-1.98	-3.67	0.7	-0.42	-0.01	0	AD
71	F	-4.17	-3.68	-1.68	-1.09	-0.13	0.02	-1.31	-1.4	-3.58	-3.96	-2.84	-3.33	-1.82	-1.49	-3.26	-3.52	-0.74	-1.64	-0.81	-0.62	-3.27	-4.26	-1.36	-2.99	-0.38	0	AD
78	M	-0.75	-1.61	0.09	-1.7	-0.31	-1.16	-1.08	-1.44	-2.26	-3.5	-1.84	-2.48	-1.64	-0.31	-1.61	-2.91	-1.58	-3.36	-0.24	-1.81	-1.75	-3.44	-2.36	-5.73	-1.26	0	AD
80	F	-2.22	-2.14	-0.96	-1.02	0.16	0.32	-0.94	-1.35	-2.2	-2.63	-1.97	-1.38	-0.68	-0.43	-1.87	-1.72	-0.5	-0.86	0.82	0.93	-2.04	-2.28	-1.03	-2.79	-0.7	0	MCI
52	M	-1.51	-2	-1.29	-1.09	-1.57	-0.92	-0.92	-1	-1.65	-1.59	-1.5	-1.72	-2.03	-1.48	-2.32	-2.79	-0.83	-1.22	-1.24	-1.23	-1.9	-1.99	1.41	-0.13	0.05	0	FTD
