# Supplementary material for: Differential Diagnosis of Alzheimer Disease vs. Mild Cognitive Impairment Based on Left Temporal Lateral Lobe Hypomethabolism on 18F-FDG PET/CT and Automated Classifiers
Source: MDPI journal article supplement (doi:10.3390/diagnostics12102425), 2022-10-07
Supplement: s1 [file s1]

Brain 18F FDG PET/CT quantitative analysis on a 70-year-old male with MCI.  
MRI showed no abnormalities, MMSE was 30/30.

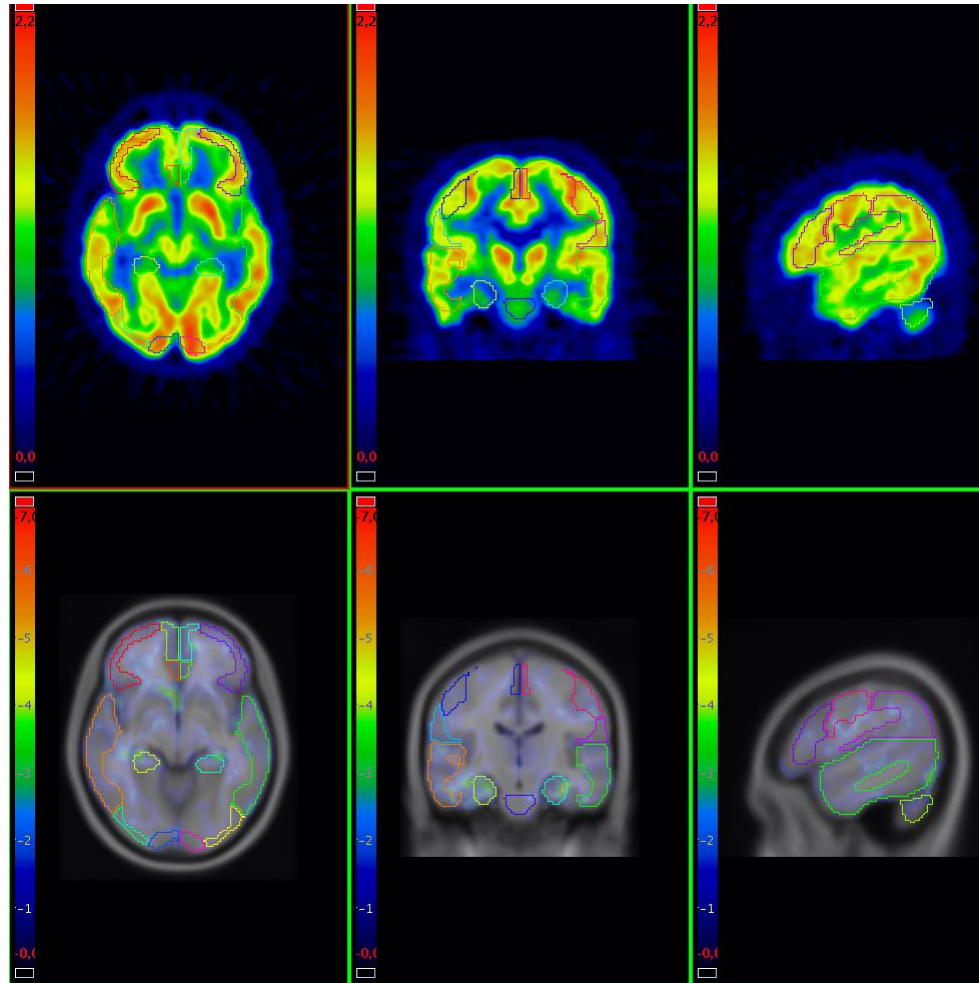

| Cortical region       | patient | normal | difference | Z score |
|-----------------------|---------|--------|------------|---------|
| Prefrontal Lateral R  | 1,47    | 1,58   | -0,11      | -0,80   |
| Prefrontal Lateral L  | 1,46    | 1,57   | -0,12      | -0,80   |
| Prefrontal Medial R   | 1,34    | 1,45   | -0,11      | -0,83   |
| Prefrontal Medial L   | 1,33    | 1,46   | -0,13      | -0,93   |
| Sensorimotor R        | 1,45    | 1,51   | -0,05      | -0,34   |
| Sensorimotor L        | 1,47    | 1,51   | -0,04      | -0,28   |
| Anterior Cingulate R  | 1,15    | 1,32   | -0,17      | -1,16   |
| Anterior Cingulate L  | 1,16    | 1,30   | -0,14      | -1,04   |
| Posterior Cingulate R | 1,36    | 1,68   | -0,32      | -1,68   |
| Posterior Cingulate L | 1,37    | 1,67   | -0,30      | -1,54   |
| Precuneus R           | 1,53    | 1,68   | -0,15      | -0,83   |
| Precuneus L           | 1,53    | 1,66   | -0,12      | -0,67   |
| Parietal Superior R   | 1,46    | 1,48   | -0,02      | -0,11   |
| Parietal Superior L   | 1,41    | 1,45   | -0,04      | -0,22   |
| Parietal Inferior R   | 1,42    | 1,54   | -0,12      | -0,79   |
| Parietal Inferior L   | 1,45    | 1,53   | -0,08      | -0,49   |
| Occipital Lateral R   | 1,47    | 1,60   | -0,13      | -0,81   |
| Occipital Lateral L   | 1,52    | 1,58   | -0,07      | -0,39   |
| Primary Visual R      | 1,62    | 1,74   | -0,12      | -0,64   |
| Primary Visual L      | 1,65    | 1,73   | -0,07      | -0,38   |
| Temporal Lateral R    | 1,22    | 1,39   | -0,18      | -1,47   |
| Temporal Lateral L    | 1,28    | 1,39   | -0,11      | -0,84   |
| Temporal Mesial R     | 0,80    | 1,06   | -0,26      | -3,34   |
| Temporal Mesial L     | 0,90    | 1,06   | -0,16      | -2,05   |
| Cerebellum Whole      | 1,24    | 1,25   | -0,02      | -0,25   |
| Pons                  | 1,00    | 1,00   | -0,00      | 0,00    |
