# Supplementary material for: Differential Diagnosis of Alzheimer Disease vs. Mild Cognitive Impairment Based on Left Temporal Lateral Lobe Hypomethabolism on 18F-FDG PET/CT and Automated Classifiers
Source: MDPI journal article supplement (doi:10.3390/diagnostics12102425), 2022-10-07
Supplement: s1 [file s1]

Brain 18F FDG PET/CT quantitative analysis on a 71-year-old female with AD.  
 MRI showed aspecific gliosis, MMSE was 26/30.

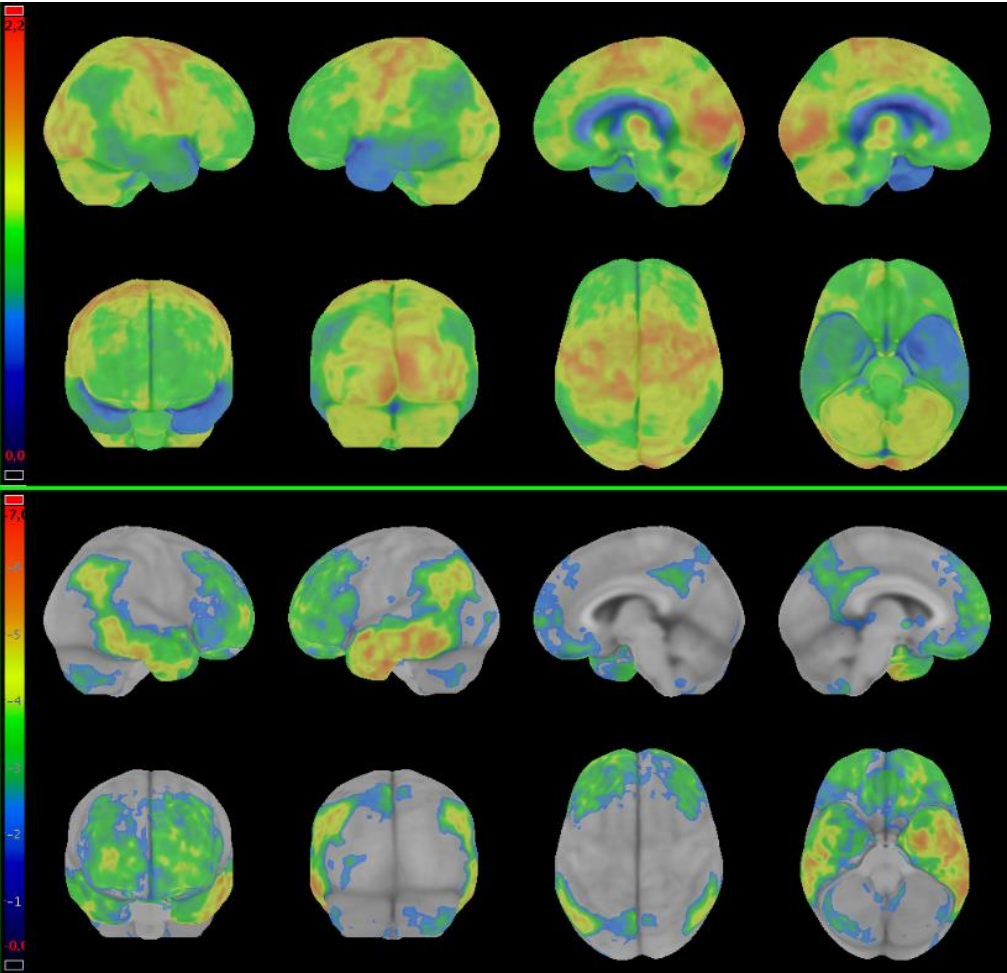

| Cortical region       | patient | normal | difference | Z score |
|-----------------------|---------|--------|------------|---------|
| Prefrontal Lateral R  | 1,19    | 1,51   | -0,32      | -2,88   |
| Prefrontal Lateral L  | 1,12    | 1,49   | -0,38      | -3,45   |
| Prefrontal Medial R   | 1,19    | 1,39   | -0,20      | -1,94   |
| Prefrontal Medial L   | 1,13    | 1,40   | -0,27      | -2,53   |
| Sensorimotor R        | 1,45    | 1,46   | -0,01      | -0,11   |
| Sensorimotor L        | 1,42    | 1,47   | -0,06      | -0,48   |
| Anterior Cingulate R  | 1,07    | 1,25   | -0,18      | -1,49   |
| Anterior Cingulate L  | 1,01    | 1,25   | -0,23      | -1,99   |
| Posterior Cingulate R | 1,25    | 1,64   | -0,38      | -2,73   |
| Posterior Cingulate L | 1,20    | 1,63   | -0,43      | -3,10   |
| Precuneus R           | 1,31    | 1,63   | -0,32      | -2,15   |
| Precuneus L           | 1,17    | 1,61   | -0,44      | -3,17   |
| Parietal Superior R   | 1,25    | 1,43   | -0,18      | -1,26   |
| Parietal Superior L   | 1,23    | 1,40   | -0,17      | -1,32   |
| Parietal Inferior R   | 1,15    | 1,47   | -0,32      | -2,71   |
| Parietal Inferior L   | 1,04    | 1,45   | -0,41      | -3,40   |
| Occipital Lateral R   | 1,38    | 1,54   | -0,17      | -1,29   |
| Occipital Lateral L   | 1,27    | 1,53   | -0,26      | -2,03   |
| Primary Visual R      | 1,49    | 1,68   | -0,19      | -1,18   |
| Primary Visual L      | 1,51    | 1,67   | -0,16      | -1,01   |
| Temporal Lateral R    | 0,98    | 1,33   | -0,35      | -3,71   |
| Temporal Lateral L    | 0,85    | 1,32   | -0,46      | -4,92   |
| Temporal Mesial R     | 0,83    | 1,04   | -0,21      | -3,10   |
| Temporal Mesial L     | 0,72    | 1,04   | -0,31      | -4,59   |
| Cerebellum Whole      | 1,14    | 1,24   | -0,10      | -1,49   |
| Pons                  | 1,00    | 1,00   | -0,00      | 0,00    |
